# Supplementary material for: Stance Phase Gait Training Post Stroke Using Simultaneous Transcranial Direct Current Stimulation and Motor Learning-Based Virtual Reality-Assisted Therapy: Protocol Development and Initial Testing
Source: MDPI journal article supplement (doi:10.3390/brainsci12060701), 2022-05-28
Supplement: s1 [file s1]

**Table S1:** Changes in each clinical measure score from baseline to post-treatment for each user.

| User         | Fugl-Meyer<br>(Points) |                 | Gait Speed<br>(m/s) |                | TUG<br>(s)      |                 | FGA<br>(Points) |                 |
|--------------|------------------------|-----------------|---------------------|----------------|-----------------|-----------------|-----------------|-----------------|
|              | Pre                    | Post            | Pre                 | Post           | Pre             | Post            | Pre             | Post            |
| S1 ●         | 28                     | 30              | 1.03                | 1.18           | 11.50           | 8.79            | 17              | 23              |
| S2 ◆         | 22                     | 23              | 0.96                | 1.23           | 13.61           | 11.94           | 14              | 18              |
| S3 ▲         | 17                     | 22              | 1.16                | 1.61           | 7.73            | 7.68            | 8               | 14              |
| S4 ■         | 17                     | 25              | 0.39                | 0.47           | 27.24           | 23.75           | 11              | 14              |
| S5 ★         | 22                     | 27              | 1.11                | 1.44           | 11.92           | 8.15            | 16              | 20              |
| Mean<br>(SD) | 21.2<br>(4.5)          | 25.40<br>(3.21) | 0.93<br>(0.31)      | 1.19<br>(0.44) | 14.40<br>(7.49) | 12.06<br>(6.74) | 13.2<br>(3.7)   | 17.80<br>(3.90) |
